# Supplementary material for: A naphthalene–thiophene hybrid molecule as a fluorescent AND logic gate with Zn2+ and OAc− ions as inputs: cell imaging and computational studies
Source: Royal Society of Chemistry journal article supplement (doi:10.1039/c3dt50450f), 2013-01-01
Supplement: c3dt50450f.pdf [file c3dt50450f.pdf]

## Electronic Supplementary Information

### Naphthalene-thiophene hybrid molecule as a fluorescent AND logic gate with Zn<sup>2+</sup> and OAc<sup>-</sup> ions as inputs: Cell imaging and computational studies

Debasis Karak,<sup>a</sup> Sudipta Das,<sup>a</sup> Sisir Lohar,<sup>a</sup> Arnab Banerjee,<sup>a</sup> Animesh Sahana,<sup>a</sup> Ipsit Hauli,<sup>b</sup> Subhra Kanti Mukhopadhyay,<sup>b</sup> Damir A. Safin,<sup>\*c</sup> Maria G. Babashkina,<sup>c</sup> Michael Bolte,<sup>d</sup> Yann Garcia<sup>c</sup> and Debasis Das<sup>\*a</sup>

<sup>a</sup> Department of Chemistry, The University of Burdwan, Burdwan, 713104, West Bengal, India. Fax: +91 342 2530452; Tel: +91 342 2533913; E-mail: ddas100in@yahoo.com

<sup>b</sup> Department of Microbiology, The University of Burdwan, Burdwan 713104, India

<sup>c</sup> Institute of Condensed Matter and Nanosciences, MOST - Inorganic Chemistry, Université Catholique de Louvain, Place L. Pasteur 1, 1348 Louvain-la-Neuve, Belgium. Fax: +32(0) 1047 2330; Tel: +32(0) 1047 2831; E-mail: damir.safin@ksu.ru

<sup>d</sup> Institut für Anorganische Chemie J.-W.-Goethe-Universität, Frankfurt/Main, Germany

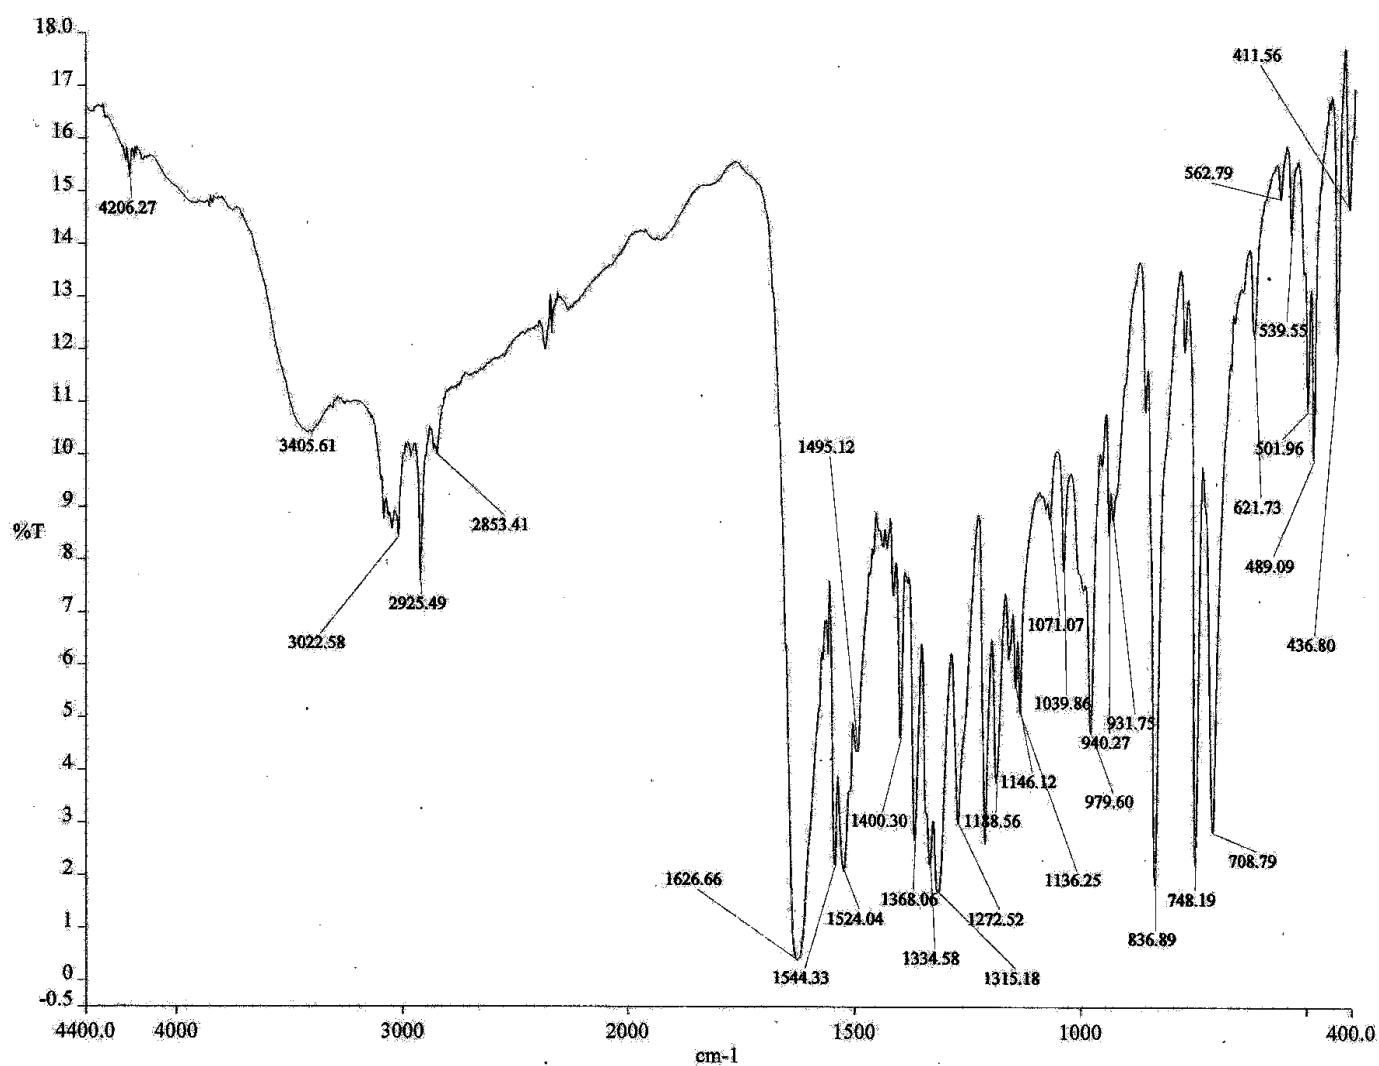

Fig. S1 FTIR spectrum of HL.

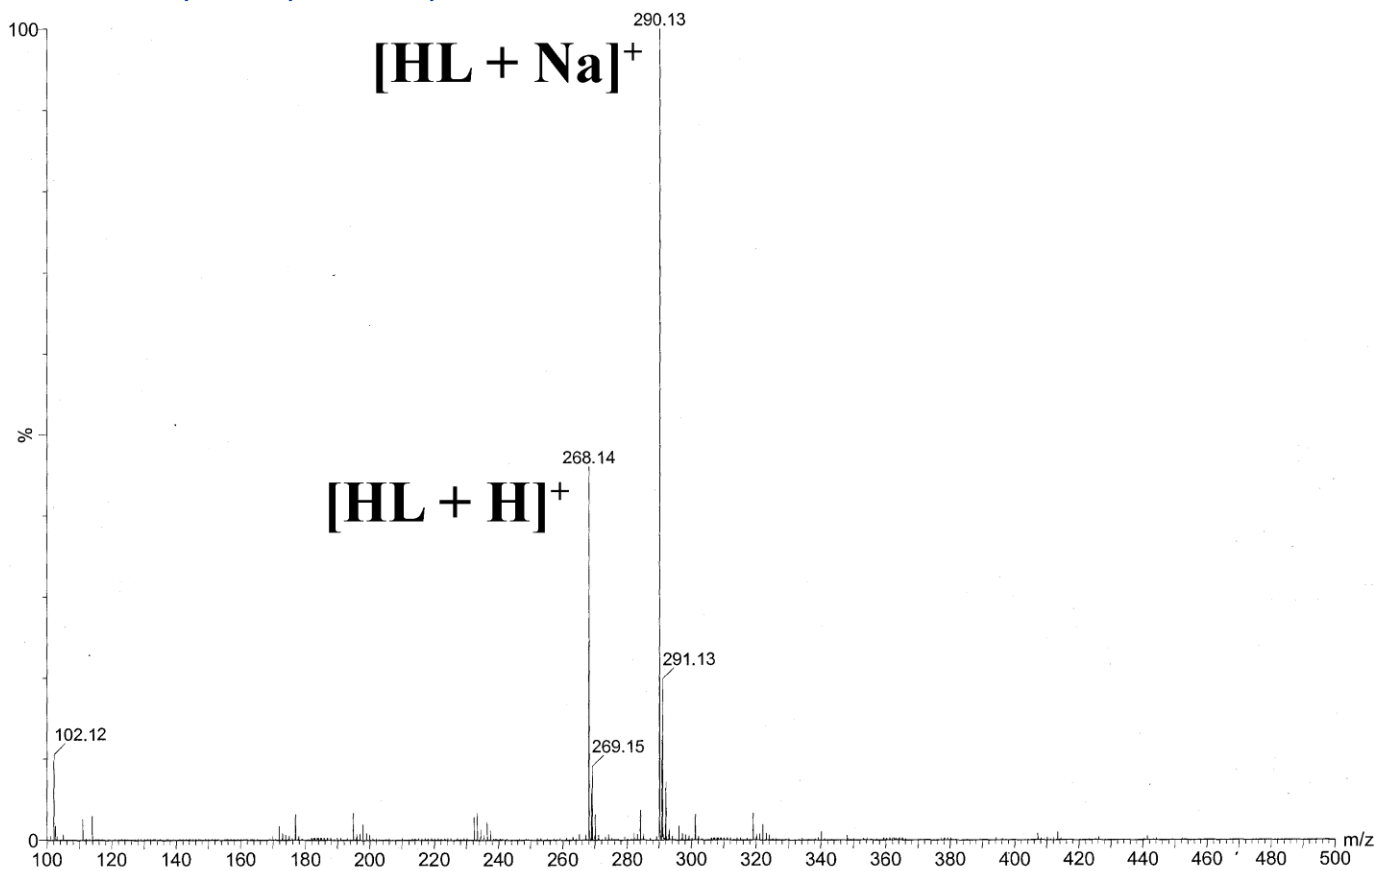

**Fig. S2** QTOF-MS<sup>+</sup> spectrum of **HL**.

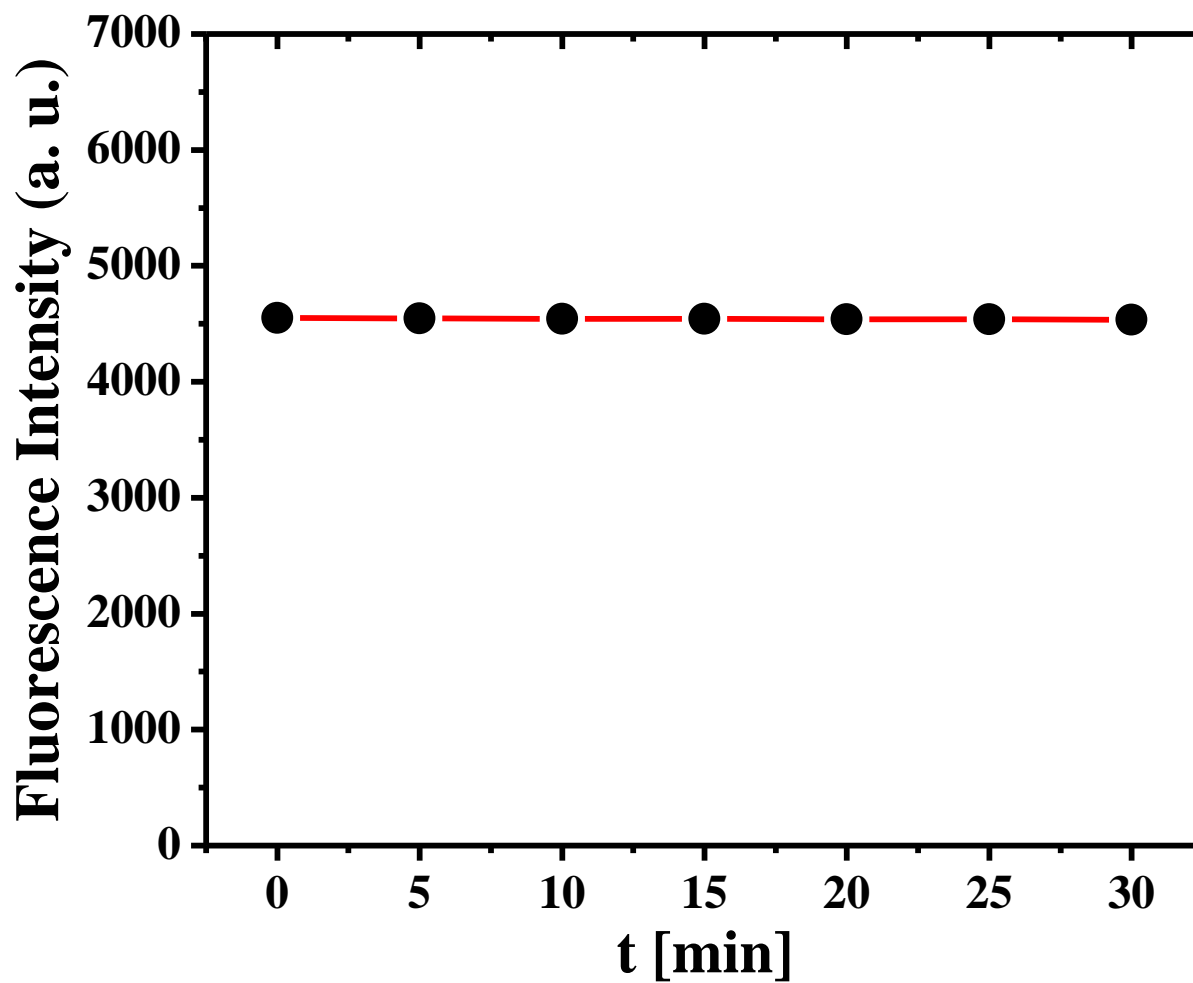

**Fig. S3** Variation of the emission intensity of the  $[\text{L-Zn}(\text{OAc})_2]$  system with time.

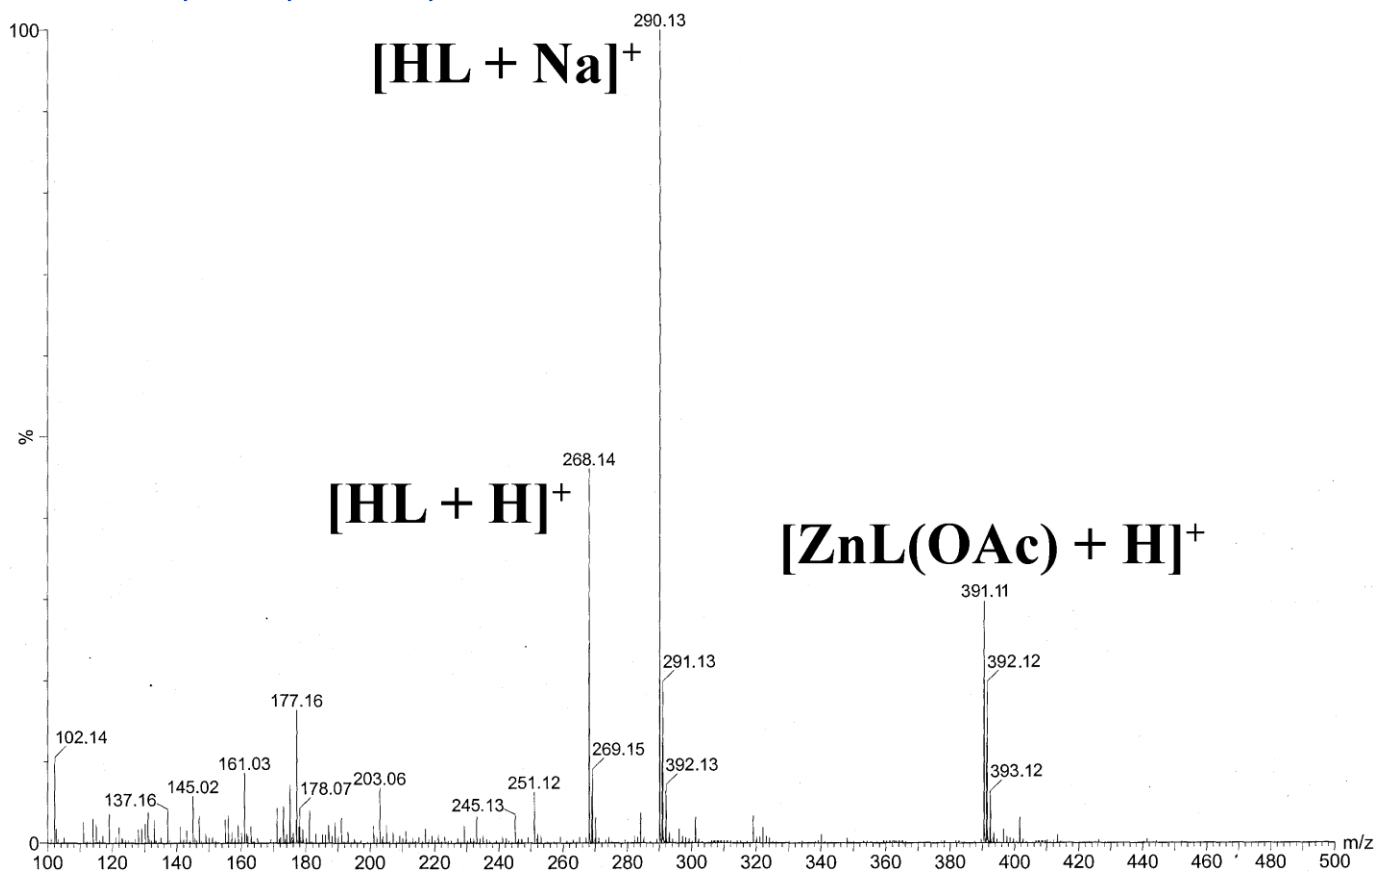

**Fig. S4** QTOF-MS<sup>+</sup> spectrum of the  $[\text{ZnL}(\text{OAc})]$  complex.

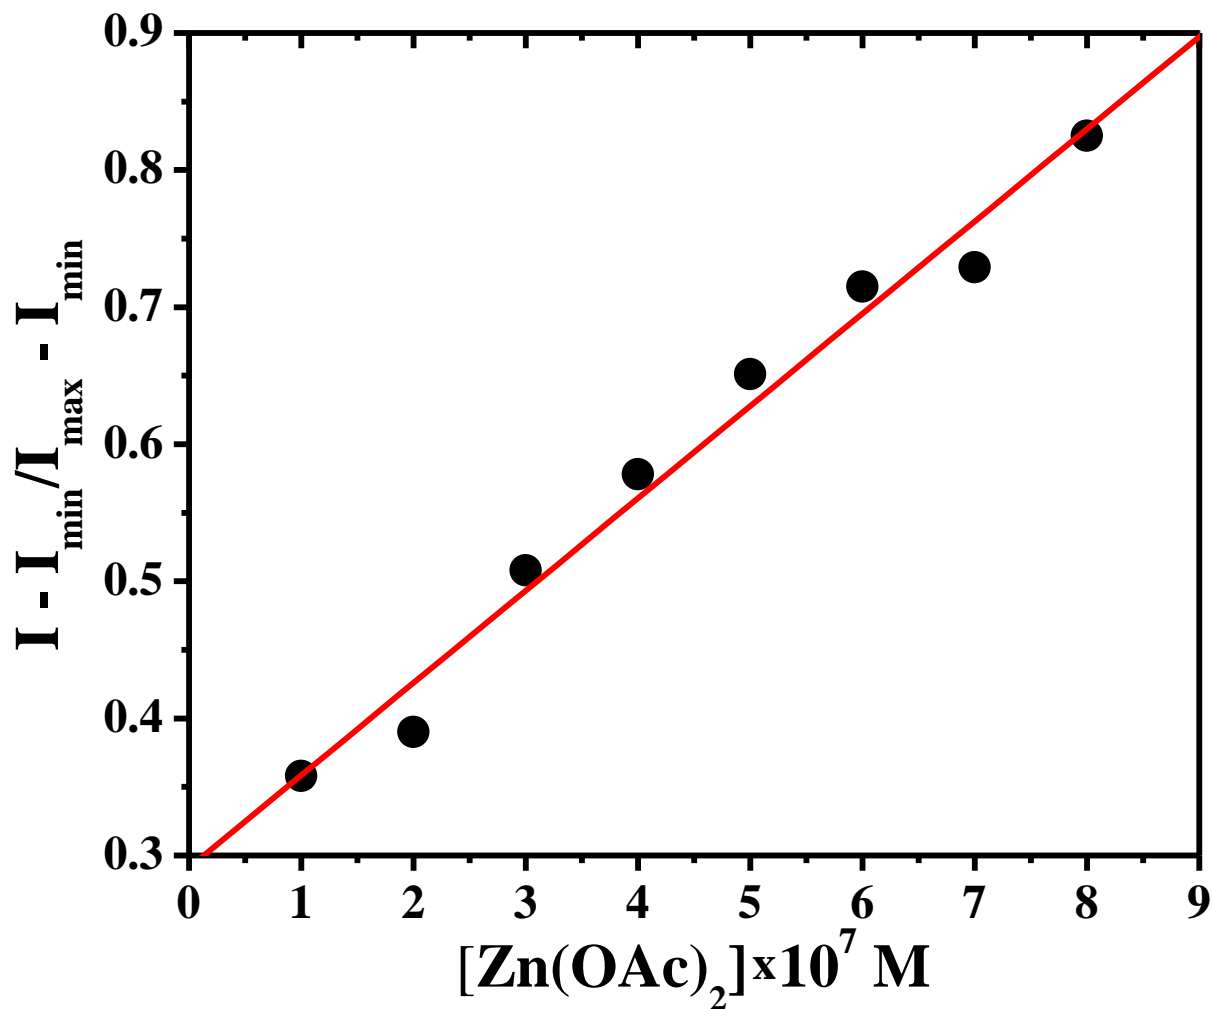

**Fig. S6** Determination of the detection limit of Zn(OAc)<sub>2</sub> by **HL** (0.1 μM, EtOH–H<sub>2</sub>O (1:1, v/v), 0.1 M HEPES buffer, pH 7.4, λ<sub>em</sub> = 448 nm). Emission intensity of **HL** is plotted as a function of Zn(OAc)<sub>2</sub> (1, 2, 3, 4, 5, 6, 7, 8, 9 and 10 μM), normalized between the minimum and maximum emission intensities. The point at which the best fitted line crosses the abscissa by extrapolation is LOD.

**Table S1** Selected bond lengths (Å) and bond angles (°) for **HL**

| <i>Bond lengths</i> |            |                   |          |                   |            |
|---------------------|------------|-------------------|----------|-------------------|------------|
| O(1)–C(12)          | 1.264(3)   | C(12)–C(13)       | 1.447(3) | C(18)–C(19)       | 1.369(4)   |
| N(1)–C(1)           | 1.308(3)   | C(13)–C(14)       | 1.345(4) | C(19)–C(20)       | 1.405(3)   |
| N(1)–C(2)           | 1.470(3)   | C(14)–C(15)       | 1.425(4) | C(21)–C(25)       | 1.606(3)   |
| C(1)–C(11)          | 1.402(3)   | C(15)–C(16)       | 1.409(3) | C(21)–S(22)       | 1.615(3)   |
| C(2)–C(21)          | 1.502(3)   | C(15)–C(20)       | 1.417(3) | S(22)–C(23)       | 1.544(4)   |
| C(11)–C(12)         | 1.436(3)   | C(16)–C(17)       | 1.360(4) | C(23)–C(24)       | 1.320(6)   |
| C(11)–C(20)         | 1.456(3)   | C(17)–C(18)       | 1.399(4) | C(24)–C(25)       | 1.535(4)   |
| <i>Bond angles</i>  |            |                   |          |                   |            |
| C(1)–N(1)–C(2)      | 123.5(2)   | C(13)–C(14)–C(15) | 122.7(2) | C(19)–C(20)–C(11) | 123.92(19) |
| N(1)–C(1)–C(11)     | 124.9(2)   | C(16)–C(15)–C(20) | 120.0(2) | C(15)–C(20)–C(11) | 118.9(2)   |
| N(1)–C(2)–C(21)     | 113.77(19) | C(16)–C(15)–C(14) | 121.0(2) | C(2)–C(21)–C(25)  | 124.1(2)   |
| C(1)–C(11)–C(12)    | 118.9(2)   | C(20)–C(15)–C(14) | 119.0(2) | C(2)–C(21)–S(22)  | 124.1(2)   |
| C(1)–C(11)–C(20)    | 120.5(2)   | C(17)–C(16)–C(15) | 121.4(2) | C(25)–C(21)–S(22) | 111.76(16) |
| C(12)–C(11)–C(20)   | 120.60(19) | C(16)–C(17)–C(18) | 118.7(2) | C(23)–S(22)–C(21) | 97.96(18)  |
| O(1)–C(12)–C(11)    | 122.9(2)   | C(19)–C(18)–C(17) | 121.4(2) | C(24)–C(23)–S(22) | 115.8(3)   |
| O(1)–C(12)–C(13)    | 119.8(2)   | C(18)–C(19)–C(20) | 121.3(2) | C(23)–C(24)–C(25) | 116.0(3)   |
| C(11)–C(12)–C(13)   | 117.2(2)   | C(19)–C(20)–C(15) | 117.2(2) | C(24)–C(25)–C(21) | 98.44(19)  |
| C(14)–C(13)–C(12)   | 121.6(2)   |                   |          |                   |            |

**Table S2** Selected bond lengths (Å) and bond angles (°) for [H<sub>3</sub>L<sub>2</sub>]ClO<sub>4</sub>

| <i>Bond lengths</i> |            |                     |            |                      |            |
|---------------------|------------|---------------------|------------|----------------------|------------|
| S(1)–C(16)          | 1.704(2)   | C(10)–C(11)         | 1.406(3)   | C(4A)–C(5A)          | 1.412(3)   |
| S(1)–C(13)          | 1.714(2)   | C(12)–C(13)         | 1.492(3)   | C(5A)–C(6A)          | 1.366(3)   |
| O(1)–C(1)           | 1.302(2)   | C(13)–C(14)         | 1.389(3)   | C(6A)–C(7A)          | 1.392(4)   |
| N(1)–C(11)          | 1.298(2)   | C(14)–C(15)         | 1.448(3)   | C(7A)–C(8A)          | 1.371(3)   |
| N(1)–C(12)          | 1.470(2)   | C(15)–C(16)         | 1.345(3)   | C(8A)–C(9A)          | 1.420(3)   |
| C(1)–C(10)          | 1.420(2)   | S(1A)–C(16A)        | 1.660(3)   | C(9A)–C(10A)         | 1.457(3)   |
| C(1)–C(2)           | 1.429(3)   | S(1A)–C(13A)        | 1.720(2)   | C(10A)–C(11A)        | 1.416(3)   |
| C(2)–C(3)           | 1.348(3)   | O(1A)–C(1A)         | 1.311(2)   | C(12A)–C(13A)        | 1.496(3)   |
| C(3)–C(4)           | 1.430(3)   | N(1A)–C(11A)        | 1.291(3)   | C(13A)–C(14A)        | 1.533(3)   |
| C(4)–C(5)           | 1.407(3)   | N(1A)–C(12A)        | 1.464(3)   | C(14A)–C(15A)        | 1.480(3)   |
| C(4)–C(9)           | 1.417(3)   | C(1A)–C(10A)        | 1.417(3)   | C(15A)–C(16A)        | 1.339(4)   |
| C(5)–C(6)           | 1.368(3)   | C(1A)–C(2A)         | 1.421(3)   | Cl(1)–O(13)          | 1.404(2)   |
| C(6)–C(7)           | 1.397(3)   | C(2A)–C(3A)         | 1.351(3)   | Cl(1)–O(11)          | 1.4141(18) |
| C(7)–C(8)           | 1.373(3)   | C(3A)–C(4A)         | 1.426(3)   | Cl(1)–O(12)          | 1.4260(16) |
| C(8)–C(9)           | 1.410(3)   | C(4A)–C(9A)         | 1.410(3)   | Cl(1)–O(14)          | 1.4372(19) |
| C(9)–C(10)          | 1.449(3)   |                     |            |                      |            |
| <i>Bond angles</i>  |            |                     |            |                      |            |
| C(16)–S(1)–C(13)    | 91.99(10)  | N(1)–C(12)–C(13)    | 110.98(16) | C(4A)–C(9A)–C(8A)    | 117.36(19) |
| C(11)–N(1)–C(12)    | 123.98(17) | C(14)–C(13)–C(12)   | 126.83(19) | C(4A)–C(9A)–C(10A)   | 119.07(17) |
| O(1)–C(1)–C(10)     | 120.38(16) | C(14)–C(13)–S(1)    | 112.67(14) | C(8A)–C(9A)–C(10A)   | 123.57(19) |
| O(1)–C(1)–C(2)      | 120.76(16) | C(12)–C(13)–S(1)    | 120.49(16) | C(11A)–C(10A)–C(1A)  | 120.63(17) |
| C(10)–C(1)–C(2)     | 118.86(16) | C(13)–C(14)–C(15)   | 109.23(17) | C(11A)–C(10A)–C(9A)  | 119.61(17) |
| C(3)–C(2)–C(1)      | 120.60(17) | C(16)–C(15)–C(14)   | 114.19(18) | C(1A)–C(10A)–C(9A)   | 119.63(17) |
| C(2)–C(3)–C(4)      | 122.72(17) | C(15)–C(16)–S(1)    | 111.92(15) | N(1A)–C(11A)–C(10A)  | 127.09(18) |
| C(5)–C(4)–C(9)      | 120.17(17) | C(16A)–S(1A)–C(13A) | 92.12(12)  | N(1A)–C(12A)–C(13A)  | 111.15(16) |
| C(5)–C(4)–C(3)      | 121.22(17) | C(11A)–N(1A)–C(12A) | 123.96(18) | C(12A)–C(13A)–C(14A) | 124.28(18) |
| C(9)–C(4)–C(3)      | 118.60(17) | O(1A)–C(1A)–C(10A)  | 119.62(17) | C(12A)–C(13A)–S(1A)  | 121.92(16) |
| C(6)–C(5)–C(4)      | 121.04(18) | O(1A)–C(1A)–C(2A)   | 121.11(16) | C(14A)–C(13A)–S(1A)  | 113.75(15) |
| C(5)–C(6)–C(7)      | 119.06(18) | C(10A)–C(1A)–C(2A)  | 119.27(17) | C(15A)–C(14A)–C(13A) | 101.79(17) |
| C(8)–C(7)–C(6)      | 121.12(19) | C(3A)–C(2A)–C(1A)   | 120.73(18) | C(16A)–C(15A)–C(14A) | 117.6(2)   |
| C(7)–C(8)–C(9)      | 121.22(18) | C(2A)–C(3A)–C(4A)   | 122.47(19) | C(15A)–C(16A)–S(1A)  | 114.7(2)   |
| C(8)–C(9)–C(4)      | 117.27(17) | C(9A)–C(4A)–C(5A)   | 120.22(19) | O(13)–Cl(1)–O(11)    | 112.01(18) |
| C(8)–C(9)–C(10)     | 123.86(16) | C(9A)–C(4A)–C(3A)   | 118.80(18) | O(13)–Cl(1)–O(12)    | 109.30(14) |
| C(4)–C(9)–C(10)     | 118.87(16) | C(5A)–C(4A)–C(3A)   | 121.0(2)   | O(11)–Cl(1)–O(12)    | 109.98(12) |
| C(11)–C(10)–C(1)    | 119.96(16) | C(6A)–C(5A)–C(4A)   | 120.9(2)   | O(13)–Cl(1)–O(14)    | 108.27(19) |
| C(11)–C(10)–C(9)    | 119.81(16) | C(5A)–C(6A)–C(7A)   | 119.3(2)   | O(11)–Cl(1)–O(14)    | 108.85(13) |
| C(1)–C(10)–C(9)     | 120.21(16) | C(8A)–C(7A)–C(6A)   | 121.3(2)   | O(12)–Cl(1)–O(14)    | 108.34(12) |
| N(1)–C(11)–C(10)    | 125.48(17) | C(7A)–C(8A)–C(9A)   | 120.9(2)   |                      |            |

**Table S3.** Hydrogen bond lengths (Å) and angles (°) for **HL** and **[H<sub>3</sub>L<sub>2</sub>]ClO<sub>4</sub>**

|                                                    | D–H···A             | <i>d</i> (D–H) | <i>d</i> (H···A) | <i>d</i> (D···A) | ∠(DHA) |
|----------------------------------------------------|---------------------|----------------|------------------|------------------|--------|
| <b>HL</b>                                          | N(1)–H(1)···O(1)    | 0.92(4)        | 1.84(4)          | 2.596(3)         | 139(3) |
| <b>[H<sub>3</sub>L<sub>2</sub>]ClO<sub>4</sub></b> | N(1)–H(1)···O(1)    | 0.81(3)        | 1.93(3)          | 2.579(2)         | 137(2) |
|                                                    | N(1A)–H(1A)···O(1A) | 0.82(3)        | 2.02(3)          | 2.630(2)         | 131(2) |
|                                                    | O(1A)–H(1O)···O(1)  | 1.17(4)        | 1.29(4)          | 2.4511(17)       | 179(3) |

**Table S4.** Relevant bond lengths (Å) and angles (°) for **[ZnL(OAc)]**, obtained using the 6-31G basis set (atom numbering refers to Fig. 14)

| <i>Bond lengths</i> |        |                   |        |                    |        |
|---------------------|--------|-------------------|--------|--------------------|--------|
| Zn(15)–N(3)         | 1.95   | Zn(15)–O(18)      | 2.06   | C(1)–N(3)          | 1.32   |
| Zn(15)–O(39)        | 1.89   | Zn(15)–O(17)      | 2.10   | O(39)–C(25)        | 1.32   |
| <i>Bond angles</i>  |        |                   |        |                    |        |
| O(39)–Zn(15)–O(18)  | 123.74 | O(39)–Zn(15)–N(3) | 96.50  | O(17)–Zn(15)–O(18) | 64.48  |
| N(3)–Zn(15)–O(18)   | 128.73 | N(3)–Zn(15)–O(17) | 117.20 | O(39)–Zn(15)–O(17) | 127.31 |



**Table S5.** Summary of the Natural Population Analysis (NPA) for **HL**

| Atom    | No | Charge   | Core     | Valence  | Rydberg | Total     |
|---------|----|----------|----------|----------|---------|-----------|
| C       | 1  | -0.22610 | 1.99900  | 4.21557  | 0.01153 | 6.22610   |
| C       | 2  | -0.23748 | 1.99898  | 4.22865  | 0.00986 | 6.23748   |
| C       | 3  | -0.01145 | 1.99894  | 4.00208  | 0.01042 | 6.01145   |
| C       | 4  | -0.08235 | 1.99891  | 4.07235  | 0.01109 | 6.08235   |
| C       | 5  | -0.20491 | 1.99897  | 4.19528  | 0.01066 | 6.20491   |
| C       | 6  | -0.25496 | 1.99899  | 4.2443   | 0.01168 | 6.25496   |
| H       | 7  | 0.24382  | 0.00000  | 0.75515  | 0.00102 | 0.75618   |
| H       | 8  | 0.22863  | 0.00000  | 0.77010  | 0.00127 | 0.77137   |
| C       | 9  | -0.21602 | 1.99891  | 4.20481  | 0.0123  | 6.21602   |
| C       | 10 | -0.17795 | 1.99897  | 4.16876  | 0.01022 | 6.17795   |
| H       | 11 | 0.24102  | 0.00000  | 0.75770  | 0.00129 | 0.75898   |
| H       | 12 | 0.24476  | 0.00000  | 0.75426  | 0.00098 | 0.75524   |
| C       | 13 | -0.28065 | 1.99893  | 4.26852  | 0.0132  | 6.28065   |
| C       | 14 | 0.42623  | 1.99895  | 3.54884  | 0.02598 | 5.57377   |
| H       | 15 | 0.24394  | 0.00000  | 0.75471  | 0.00134 | 0.75606   |
| H       | 16 | 0.25697  | 0.00000  | 0.74121  | 0.00182 | 0.74303   |
| O       | 17 | -0.65548 | 1.99979  | 6.65195  | 0.00374 | 8.65548   |
| C       | 18 | 0.11902  | 1.99908  | 3.86724  | 0.01465 | 5.88098   |
| H       | 19 | 0.22797  | 0.00000  | 0.77068  | 0.00136 | 0.77203   |
| N       | 20 | -0.56068 | 1.99922  | 5.55152  | 0.00994 | 7.56068   |
| C       | 21 | -0.29988 | 1.99904  | 4.28795  | 0.01289 | 6.29988   |
| H       | 22 | 0.25426  | 0.00000  | 0.74368  | 0.00206 | 0.74574   |
| H       | 23 | 0.26791  | 0.00000  | 0.72998  | 0.00211 | 0.73209   |
| C       | 24 | -0.19492 | 1.99885  | 4.18080  | 0.01527 | 6.19492   |
| C       | 25 | -0.28455 | 1.99875  | 4.27428  | 0.01153 | 6.28455   |
| S       | 26 | 0.34053  | 9.99934  | 5.64639  | 0.01374 | 15.65947  |
| C       | 27 | -0.27975 | 1.99888  | 4.26883  | 0.01204 | 6.27975   |
| H       | 28 | 0.26870  | 0.00000  | 0.72964  | 0.00166 | 0.73130   |
| C       | 29 | -0.39437 | 1.99894  | 4.38343  | 0.01200 | 6.39437   |
| H       | 30 | 0.25952  | 0.00000  | 0.73972  | 0.00076 | 0.74048   |
| H       | 31 | 0.26528  | 0.00000  | 0.73404  | 0.00067 | 0.73472   |
| H       | 32 | 0.47294  | 0.00000  | 0.52145  | 0.00561 | 0.52706   |
| *Total* |    | 0.00000  | 45.98144 | 93.76387 | 0.25469 | 140.00000 |

**Table S6.** Summary of the Natural Population Analysis (NPA) for [ZnL(OAc)]

| Atom    | No | Charge   | Core     | Valence   | Rydberg | Total     |
|---------|----|----------|----------|-----------|---------|-----------|
| C       | 1  | 0.13199  | 1.99916  | 3.84887   | 0.01999 | 5.86801   |
| H       | 2  | 0.21075  | 0.00000  | 0.78707   | 0.00218 | 0.78925   |
| N       | 3  | -0.72784 | 1.99938  | 5.70013   | 0.02833 | 7.72784   |
| C       | 4  | -0.31512 | 1.99901  | 4.29810   | 0.01801 | 6.31512   |
| H       | 5  | 0.24847  | 0.00000  | 0.74929   | 0.00224 | 0.75153   |
| H       | 6  | 0.27382  | 0.00000  | 0.72361   | 0.00258 | 0.72618   |
| C       | 7  | -0.20233 | 1.99882  | 4.18747   | 0.01603 | 6.20233   |
| C       | 8  | -0.27952 | 1.99875  | 4.26910   | 0.01166 | 6.27952   |
| S       | 9  | 0.37377  | 9.99932  | 5.61105   | 0.01586 | 15.62623  |
| C       | 10 | -0.28713 | 1.99888  | 4.27613   | 0.01211 | 6.28713   |
| H       | 11 | 0.25245  | 0.00000  | 0.74664   | 0.00091 | 0.74755   |
| C       | 12 | -0.39507 | 1.99895  | 4.38381   | 0.01232 | 6.39507   |
| H       | 13 | 0.25756  | 0.00000  | 0.74167   | 0.00078 | 0.74244   |
| H       | 14 | 0.26622  | 0.00000  | 0.73309   | 0.00069 | 0.73378   |
| Zn      | 15 | 1.58550  | 17.99821 | 10.34388  | 0.07241 | 28.4145   |
| C       | 16 | 0.75458  | 1.99942  | 3.19315   | 0.05285 | 5.24542   |
| O       | 17 | -0.77000 | 1.99980  | 6.76505   | 0.00516 | 8.77000   |
| O       | 18 | -0.78165 | 1.9998   | 6.77630   | 0.00555 | 8.78165   |
| C       | 19 | -0.79258 | 1.99914  | 4.78757   | 0.00587 | 6.79258   |
| H       | 20 | 0.26929  | 0.00000  | 0.72949   | 0.00122 | 0.73071   |
| H       | 21 | 0.27324  | 0.00000  | 0.72584   | 0.00092 | 0.72676   |
| H       | 22 | 0.26529  | 0.00000  | 0.73332   | 0.00138 | 0.73471   |
| C       | 23 | -0.20120 | 1.99888  | 4.19054   | 0.01179 | 6.20120   |
| C       | 24 | -0.00837 | 1.99895  | 3.99907   | 0.01035 | 6.00837   |
| C       | 25 | 0.42250  | 1.99881  | 3.55354   | 0.02515 | 5.57750   |
| C       | 26 | -0.23865 | 1.99898  | 4.22991   | 0.00977 | 6.23865   |
| C       | 27 | -0.08136 | 1.99892  | 4.07138   | 0.01106 | 6.08136   |
| C       | 28 | -0.27480 | 1.99893  | 4.26322   | 0.01265 | 6.27480   |
| C       | 29 | -0.22406 | 1.99900  | 4.21348   | 0.01158 | 6.22406   |
| H       | 30 | 0.23027  | 0.00000  | 0.76841   | 0.00132 | 0.76973   |
| C       | 31 | -0.20326 | 1.99897  | 4.19358   | 0.01071 | 6.20326   |
| C       | 32 | -0.17289 | 1.99896  | 4.16368   | 0.01024 | 6.17289   |
| H       | 33 | 0.26203  | 0.00000  | 0.73618   | 0.00179 | 0.73797   |
| C       | 34 | -0.25245 | 1.99898  | 4.24178   | 0.01169 | 6.25245   |
| H       | 35 | 0.24471  | 0.00000  | 0.75427   | 0.00102 | 0.75529   |
| H       | 36 | 0.24213  | 0.00000  | 0.75659   | 0.00127 | 0.75787   |
| H       | 37 | 0.24619  | 0.00000  | 0.75249   | 0.00132 | 0.75381   |
| H       | 38 | 0.24601  | 0.00000  | 0.75302   | 0.00098 | 0.75399   |
| O       | 39 | -0.84849 | 1.99977  | 6.83997   | 0.00874 | 8.84849   |
| *Total* |    | 0.00000  | 71.97779 | 127.59174 | 0.43047 | 200.00000 |
